# Supplementary material
Source: PubMed Central journal article supplement (PMC2575452)
Supplement: 0804187105_ST1.pdf [file 0804187105_ST1.pdf]

**Table S1: Average number of deuterons incorporated in Sse1 in the presence and absence of nucleotide**

| PEPTIDE |     |                    | DATASET 1               |      |       |      | DATASET 2               |       |      |
|---------|-----|--------------------|-------------------------|------|-------|------|-------------------------|-------|------|
| Start   | End | Mass (exp)<br>[Da] | HX time                 | 10s  | 2 min | 100% | HX time                 | 2 min | 100% |
| 2       | 16  | 1546.8             | nucl.-free              | N.D. | N.D.  | N.D. | nucl.-free              | 8.5   | 8.6  |
|         |     |                    | ADP 1 mM <sup>(1)</sup> | N.D. | N.D.  |      | ADP 1 mM <sup>(1)</sup> | 4.9   |      |
|         |     |                    | ATP 100 uM              | N.D. | N.D.  |      | ATP 1 mM                | 1.3   |      |
| 17      | 25  | 970.5              |                         | 5.3  | 5.7   | 6.0  |                         | 6.0   | 6.2  |
|         |     |                    |                         | 4.4  | 4.8   |      |                         | 5.3   |      |
|         |     |                    |                         | 3.5  | 4.3   |      |                         | 4.8   |      |
| 69      | 75  | 813.5              |                         | 3.6  | 3.8   | 4.3  |                         | 4.3   | 4.0  |
|         |     |                    |                         | 1.9  | 2.7   |      |                         | N.D.  |      |
|         |     |                    |                         | 1.0  | 1.8   |      |                         | 2.3   |      |
| 69      | 81  | 1609.8             |                         | 5.7  | 5.2   | 5.9  |                         | 6.1   | 6.0  |
|         |     |                    |                         | 2.3  | 3.6   |      |                         | 3.5   |      |
|         |     |                    |                         | 0.9  | 2.1   |      |                         | 2.4   |      |
| 75      | 92  | 2244.0             |                         | 9.4  | 9.4   | 10.4 |                         | 9.6   | 9.7  |
|         |     |                    |                         | 7.4  | 9.1   |      |                         | 8.0   |      |
|         |     |                    |                         | 4.0  | 6.5   |      |                         | 7.0   |      |
| 76      | 81  | 814.3              |                         | 0.9  | 3.6   | 3.5  |                         | N.D.  | N.D. |
|         |     |                    |                         | 0.5  | 0.6   |      |                         | N.D.  |      |
|         |     |                    |                         | 0.2  | 0.5   |      |                         | N.D.  |      |
| 93      | 106 | 1605.9             |                         | 7.7  | 9.1   | 8.2  |                         | N.D.  | N.D. |
|         |     |                    |                         | 5.0  | 5.2   |      |                         | N.D.  |      |
|         |     |                    |                         | 1.1  | 2.7   |      |                         | N.D.  |      |
| 104     | 118 | 1688.9             |                         | 9.2  | 8.9   | 9.6  |                         | 10.9  | N.D. |
|         |     |                    |                         | 8.6  | 7.6   |      |                         | 10.0  |      |
|         |     |                    |                         | 3.9  | 6.6   |      |                         | 9.3   |      |
| 107     | 118 | 1286.7             |                         | 6.9  | 7.2   | 7.6  |                         | N.D.  | N.D. |
|         |     |                    |                         | 4.7  | 5.9   |      |                         | N.D.  |      |
|         |     |                    |                         | 2.7  | 4.6   |      |                         | N.D.  |      |
| 122     | 140 | 2178.2             |                         | 11.5 | 11.9  | 12.4 |                         | N.D.  | N.D. |
|         |     |                    |                         | 8.4  | 9.8   |      |                         | N.D.  |      |
|         |     |                    |                         | 6.3  | 8.1   |      |                         | N.D.  |      |
| 122     | 142 | 2380.4             |                         | 11.3 | 11.8  | 19.5 |                         | 13.0  | N.D. |
|         |     |                    |                         | 7.0  | 9.6   |      |                         | 10.8  |      |
|         |     |                    |                         | 6.3  | 8.2   |      |                         | 9.2   |      |
| 123     | 142 | 2233.2             |                         | 10.8 | 11.8  | 21.3 |                         | 12.5  | N.D. |
|         |     |                    |                         | 8.6  | 9.8   |      |                         | 10.5  |      |
|         |     |                    |                         | 6.6  | 8.4   |      |                         | 9.5   |      |
| 143     | 152 | 1203.6             |                         | 0.7  | 1.7   | 5.5  |                         | N.D.  | N.D. |
|         |     |                    |                         | 0.7  | 1.5   |      |                         | N.D.  |      |
|         |     |                    |                         | 0.8  | 1.1   |      |                         | N.D.  |      |
| 143     | 159 | 2064.0             |                         | 0.9  | 2.0   | 11.5 |                         | 2.7   | N.D. |
|         |     |                    |                         | 0.8  | 1.8   |      |                         | 2.3   |      |
|         |     |                    |                         | 0.8  | 1.4   |      |                         | 1.9   |      |
| 153     | 159 | 878.4              |                         | 0.1  | 0.3   | 4.2  |                         | 0.7   | N.D. |
|         |     |                    |                         | 0.1  | 0.2   |      |                         | 0.2   |      |

Table S1

|            |            |        |      |      |      |      |      |
|------------|------------|--------|------|------|------|------|------|
|            |            |        | 0.1  | 0.2  |      | 0.3  |      |
| <b>160</b> | <b>174</b> | 1577.9 | 0.7  | 1.6  | 10.7 | 2.0  | N.D. |
|            |            |        | 0.6  | 1.4  |      | 1.7  |      |
|            |            |        | 0.4  | 1.0  |      | 1.3  |      |
| <b>160</b> | <b>177</b> | 1849.0 | 0.4  | 1.5  | 13.2 | 1.5  | N.D. |
|            |            |        | 0.3  | 1.2  |      | 1.1  |      |
|            |            |        | 0.3  | 0.9  |      | 0.9  |      |
| <b>160</b> | <b>182</b> | 2326.2 | 0.4  | 1.3  | N.D. | N.D. | N.D. |
|            |            |        | 0.2  | 0.9  |      | N.D. |      |
|            |            |        | 0.0  | 0.6  |      | N.D. |      |
| <b>186</b> | <b>200</b> | 1680.9 | 3.8  | 4.5  | 8.2  | 4.9  | 8.4  |
|            |            |        | 3.8  | 4.3  |      | 4.7  |      |
|            |            |        | 3.9  | 4.5  |      | 4.8  |      |
| <b>186</b> | <b>201</b> | 1828.0 | 3.6  | 4.2  | 8.8  | 4.5  | 8.9  |
|            |            |        | 3.8  | 4.2  |      | 4.6  |      |
|            |            |        | 3.8  | 4.3  |      | 4.6  |      |
| <b>201</b> | <b>214</b> | 1558.7 | 0.9  | 2.7  | N.D. | 2.9  | N.D. |
|            |            |        | 0.4  | 0.5  |      | 0.3  |      |
|            |            |        | 0.3  | 0.4  |      | 0.2  |      |
| <b>202</b> | <b>211</b> | 1080.5 | 1.0  | 2.3  | N.D. | 3.0  | N.D. |
|            |            |        | 0.2  | 0.6  |      | 1.1  |      |
|            |            |        | 0.0  | 0.2  |      | 0.6  |      |
| <b>202</b> | <b>212</b> | 1167.5 | 1.1  | 2.6  | 11.0 | 3.0  | 8.9  |
|            |            |        | 0.5  | 0.6  |      | 0.8  |      |
|            |            |        | 0.2  | 0.3  |      | 0.3  |      |
| <b>202</b> | <b>214</b> | 1411.6 | 0.9  | 2.5  | N.D. | N.D. | N.D. |
|            |            |        | 0.2  | 0.7  |      | N.D. |      |
|            |            |        | 0.1  | 0.1  |      | N.D. |      |
| <b>202</b> | <b>215</b> | 1482.7 | 1.0  | 2.3  | 9.4  | 3.0  | N.D. |
|            |            |        | 0.4  | 0.7  |      | 1.4  |      |
|            |            |        | 0.1  | 0.2  |      | 1.1  |      |
| <b>215</b> | <b>236</b> | 2375.3 | 5.2  | 6.5  | N.D. | 7.1  | N.D. |
|            |            |        | 2.8  | 4.5  |      | 5.2  |      |
|            |            |        | 2.6  | 4.1  |      | 4.2  |      |
| <b>215</b> | <b>239</b> | 2750.4 | 6.6  | 8.0  | 17.9 | 9.4  | N.D. |
|            |            |        | 2.4  | 4.8  |      | 5.9  |      |
|            |            |        | 2.3  | 3.6  |      | 4.3  |      |
| <b>216</b> | <b>236</b> | 2304.2 | 4.8  | 6.2  | N.D. | 7.3  | N.D. |
|            |            |        | 2.6  | 4.4  |      | 4.9  |      |
|            |            |        | 2.3  | 3.5  |      | 4.1  |      |
| <b>239</b> | <b>248</b> | 1144.6 | 4.6  | 5.0  | 5.6  | 6.5  | N.D. |
|            |            |        | 0.2  | 2.1  |      | 2.2  |      |
|            |            |        | 0.1  | 0.5  |      | 0.5  |      |
| <b>240</b> | <b>248</b> | 1031.5 | 3.6  | 3.9  | 4.3  | 4.4  | 4.4  |
|            |            |        | 0.3  | 1.9  |      | 2.1  |      |
|            |            |        | 0.2  | 0.7  |      | 1.1  |      |
| <b>240</b> | <b>249</b> | 1178.5 | 4.6  | 5.2  | 4.8  | 5.5  | N.D. |
|            |            |        | 0.4  | 1.5  |      | 2.0  |      |
|            |            |        | 0.4  | 1.1  |      | 1.2  |      |
| <b>241</b> | <b>248</b> | 960.4  | 2.7  | 2.8  | 3.2  | 3.4  | 3.3  |
|            |            |        | 0.3  | 1.4  |      | 1.7  |      |
|            |            |        | 0.3  | 0.5  |      | 1.1  |      |
| <b>249</b> | <b>269</b> | 2610.5 | 12.3 | 13.8 | 14.5 | 15.1 | 15.8 |

Table S1

|                                |        |  |      |      |      |      |      |
|--------------------------------|--------|--|------|------|------|------|------|
|                                |        |  | 3.7  | 8.8  |      | 10.0 |      |
|                                |        |  | 3.4  | 7.6  |      | 8.3  |      |
| <b>270 289</b>                 | 2116.2 |  | 11.7 | 13.6 | 14.1 | 14.1 | N.D. |
|                                |        |  | 5.0  | 8.4  |      | 8.8  |      |
|                                |        |  | 4.7  | 6.5  |      | 6.2  |      |
| <b>290 301</b>                 | 1292.6 |  | 7.2  | 7.5  | 7.8  | 8.0  | 8.1  |
|                                |        |  | 4.0  | 6.0  |      | 6.3  |      |
|                                |        |  | 3.8  | 5.3  |      | 5.6  |      |
| <b>293 301</b>                 | 975.5  |  | 5.2  | 5.3  | 5.5  | N.D. | N.D. |
|                                |        |  | 2.2  | 4.0  |      | N.D. |      |
|                                |        |  | 2.1  | 3.1  |      | N.D. |      |
| <b>295 308</b>                 | 1618.8 |  | 6.6  | 8.8  | 9.6  | 9.9  | N.D. |
|                                |        |  | 2.7  | 4.7  |      | 4.9  |      |
|                                |        |  | 2.6  | 3.8  |      | 4.0  |      |
| <b>307 314</b>                 | 939.6  |  | 1.4  | 3.7  | 4.2  | 4.2  | N.D. |
|                                |        |  | 0.1  | 1.0  |      | 1.0  |      |
|                                |        |  | 0.1  | 0.8  |      | 0.8  |      |
| <b>307 315</b>                 | 1068.6 |  | 1.8  | 4.9  | 5.1  | 4.7  | N.D. |
|                                |        |  | 0.3  | 1.5  |      | 1.3  |      |
|                                |        |  | 0.3  | 1.3  |      | 1.2  |      |
| <b>308 / 314 /<br/>309 315</b> | 810.5  |  | 1.6  | 3.3  | 3.6  | 3.5  | 3.6  |
|                                |        |  | 0.4  | 1.5  |      | 1.7  |      |
|                                |        |  | 0.2  | 1.2  |      | 1.6  |      |
| <b>315 330</b>                 | 1753.0 |  | 2.5  | 2.9  | 11.9 | 2.7  | N.D. |
|                                |        |  | 1.3  | 2.1  |      | 2.1  |      |
|                                |        |  | 0.9  | 1.9  |      | 1.8  |      |
| <b>315 332</b>                 | 1911.1 |  | 2.7  | 4.4  | 13.2 | 4.7  | N.D. |
|                                |        |  | 1.8  | 2.9  |      | 3.3  |      |
|                                |        |  | 1.8  | 3.0  |      | 3.4  |      |
| <b>315 337</b>                 | 2530.3 |  | 3.9  | 5.4  | 17.3 | N.D. | N.D. |
|                                |        |  | 2.7  | 4.2  |      | N.D. |      |
|                                |        |  | 2.7  | 4.0  |      | N.D. |      |
| <b>337 357</b>                 | 2259.2 |  | 9.9  | 11.0 | 15.1 | 12.4 | 15.1 |
|                                |        |  | 3.1  | 1.7  |      | 5.0  |      |
|                                |        |  | 2.2  | 1.9  |      | 2.0  |      |
| <b>338 357</b>                 | 2112.2 |  | 9.7  | 12.1 | 14.5 | 12.6 | N.D. |
|                                |        |  | 2.3  | 5.4  |      | 5.3  |      |
|                                |        |  | 1.5  | 1.9  |      | 1.8  |      |
| <b>358 366</b>                 | 962.5  |  | 3.9  | 5.0  | 5.2  | 5.4  | 5.4  |
|                                |        |  | 2.3  | 4.2  |      | 4.4  |      |
|                                |        |  | 2.0  | 4.0  |      | 4.3  |      |
| <b>358 377</b>                 | 2031.1 |  | 6.2  | N.D. | N.D. | N.D. | N.D. |
|                                |        |  | 4.8  | N.D. |      | N.D. |      |
|                                |        |  | 4.6  | N.D. |      | N.D. |      |
| <b>358 378</b>                 | 2178.1 |  | 7.3  | 10.6 | 15.0 | N.D. | N.D. |
|                                |        |  | 5.0  | 7.7  |      | N.D. |      |
|                                |        |  | 4.7  | 7.6  |      | N.D. |      |
| <b>367 377</b>                 | 1086.5 |  | 2.7  | 5.5  | 6.7  | 6.5  | 6.8  |
|                                |        |  | 1.7  | 3.5  |      | 3.7  |      |
|                                |        |  | 1.4  | 2.5  |      | 2.6  |      |
| <b>367 378</b>                 | 1233.6 |  | 2.5  | 6.0  | 7.6  | 7.0  | 7.6  |
|                                |        |  | 1.4  | 3.2  |      | 3.9  |      |
|                                |        |  | 1.2  | 2.3  |      | 2.6  |      |

Table S1

|            |            |        |     |     |      |      |      |
|------------|------------|--------|-----|-----|------|------|------|
| <b>379</b> | <b>387</b> | 953.5  | 3.1 | 4.3 | 7.2  | 4.8  | 14.4 |
|            |            |        | 2.9 | 3.4 |      | 3.8  |      |
|            |            |        | 2.9 | 3.2 |      | 3.6  |      |
| <b>388</b> | <b>394</b> | 948.6  | 2.4 | 3.2 | 3.4  | 3.9  | 3.8  |
|            |            |        | 2.5 | 3.2 |      | 3.6  |      |
|            |            |        | 2.5 | 3.3 |      | 4.0  |      |
| <b>388</b> | <b>403</b> | 1976.0 | 3.3 | 4.9 | 9.2  | 5.3  | N.D. |
|            |            |        | 3.2 | 5.0 |      | 5.3  |      |
|            |            |        | 3.3 | 5.4 |      | 5.7  |      |
| <b>388</b> | <b>404</b> | 2139.1 | 3.1 | 4.9 | 10.0 | N.D. | N.D. |
|            |            |        | 3.1 | 4.9 |      | N.D. |      |
|            |            |        | 3.2 | 5.3 |      | N.D. |      |
| <b>395</b> | <b>403</b> | 1045.5 | 0.7 | 1.4 | 4.5  | 1.1  | N.D. |
|            |            |        | 0.7 | 1.7 |      | 1.4  |      |
|            |            |        | 0.8 | 2.0 |      | 1.9  |      |
| <b>395</b> | <b>404</b> | 1208.5 | 0.9 | 1.6 | 5.5  | N.D. | N.D. |
|            |            |        | 0.6 | 1.8 |      | N.D. |      |
|            |            |        | 0.7 | 1.9 |      | N.D. |      |
| <b>404</b> | <b>416</b> | 1680.7 | 4.6 | 5.7 | 7.4  | 6.3  | 8.0  |
|            |            |        | 4.4 | 5.4 |      | 5.9  |      |
|            |            |        | 4.3 | 5.3 |      | 5.9  |      |
| <b>405</b> | <b>416</b> | 1517.6 | 4.7 | 5.5 | 6.5  | 6.1  | N.D. |
|            |            |        | 4.5 | 5.4 |      | 6.0  |      |
|            |            |        | 4.5 | 5.3 |      | 6.0  |      |
| <b>417</b> | <b>430</b> | 1465.7 | 3.1 | 4.3 | 7.2  | 4.7  | 7.3  |
|            |            |        | 3.1 | 4.1 |      | 4.5  |      |
|            |            |        | 3.1 | 4.3 |      | 4.8  |      |
| <b>431</b> | <b>439</b> | 1035.5 | 1.1 | 2.3 | 5.5  | 2.5  | 5.7  |
|            |            |        | 1.0 | 2.4 |      | 2.6  |      |
|            |            |        | 0.9 | 2.4 |      | 2.7  |      |
| <b>431</b> | <b>444</b> | 1482.7 | 1.3 | 2.8 | 9.7  | 3.4  | N.D. |
|            |            |        | 1.3 | 2.7 |      | 3.1  |      |
|            |            |        | 1.3 | 2.8 |      | 3.1  |      |
| <b>434</b> | <b>441</b> | 926.4  | 0.9 | 1.8 | 4.6  | 2.1  | 4.6  |
|            |            |        | 0.8 | 1.6 |      | 1.9  |      |
|            |            |        | 0.8 | 1.6 |      | 1.9  |      |
| <b>434</b> | <b>442</b> | 997.4  | 0.7 | 1.7 | 5.6  | 1.8  | N.D. |
|            |            |        | 0.6 | 1.6 |      | 1.9  |      |
|            |            |        | 0.6 | 1.6 |      | 2.1  |      |
| <b>434</b> | <b>444</b> | 1155.5 | 0.8 | 1.8 | 6.8  | 2.0  | 6.6  |
|            |            |        | 0.7 | 1.8 |      | 1.9  |      |
|            |            |        | 0.7 | 1.7 |      | 1.8  |      |
| <b>445</b> | <b>458</b> | 1615.8 | 3.6 | 5.9 | 7.0  | N.D. | N.D. |
|            |            |        | 3.5 | 5.7 |      | N.D. |      |
|            |            |        | 3.4 | 5.8 |      | N.D. |      |
| <b>445</b> | <b>462</b> | 2100.0 | 3.8 | 6.3 | 9.8  | 5.9  | 10.1 |
|            |            |        | 3.3 | 6.0 |      | 5.6  |      |
|            |            |        | 3.3 | 6.1 |      | 5.4  |      |
| <b>446</b> | <b>462</b> | 1937.0 | 2.3 | 5.2 | 9.4  | N.D. | N.D. |
|            |            |        | 2.2 | 4.8 |      | N.D. |      |
|            |            |        | 2.7 | 4.4 |      | N.D. |      |
| <b>463</b> | <b>482</b> | 2149.2 | 3.5 | 5.1 | 12.8 | 5.7  | 8.4  |
|            |            |        | 3.5 | 5.0 |      | 5.5  |      |

Table S1

|            |            |        |     |      |      |      |      |
|------------|------------|--------|-----|------|------|------|------|
|            |            |        | 3.5 | 5.0  |      | 5.4  |      |
| <b>463</b> | <b>489</b> | 2877.5 | 4.0 | 6.2  | 13.8 | N.D. | N.D. |
|            |            |        | 3.6 | 5.8  |      | N.D. |      |
|            |            |        | 3.8 | 5.7  |      | N.D. |      |
| <b>501</b> | <b>516</b> | 1790.9 | 4.0 | 6.1  | 6.7  | N.D. | N.D. |
|            |            |        | 4.0 | 5.9  |      | N.D. |      |
|            |            |        | 3.7 | 6.3  |      | N.D. |      |
| <b>503</b> | <b>516</b> | 1548.7 | 3.0 | 4.7  | 5.0  | N.D. | N.D. |
|            |            |        | 3.3 | 4.7  |      | N.D. |      |
|            |            |        | 3.1 | 4.8  |      | N.D. |      |
| <b>503</b> | <b>519</b> | 1876.8 | 5.0 | 6.7  | 7.2  | 7.7  | N.D. |
|            |            |        | 5.2 | 6.6  |      | 7.0  |      |
|            |            |        | 5.2 | 6.8  |      | 7.3  |      |
| <b>521</b> | <b>533</b> | 1548.9 | 3.9 | 6.6  | 7.8  | 6.3  | 7.5  |
|            |            |        | 4.5 | 6.4  |      | 7.2  |      |
|            |            |        | 4.6 | 6.6  |      | 7.2  |      |
| <b>534</b> | <b>550</b> | 1869.0 | 4.8 | 9.9  | 11.6 | 8.2  | 11.7 |
|            |            |        | 5.0 | 8.1  |      | 8.0  |      |
|            |            |        | 4.0 | 6.8  |      | 6.8  |      |
| <b>551</b> | <b>563</b> | 1559.8 | 7.9 | 8.1  | 8.5  | 6.8  | 7.2  |
|            |            |        | 4.0 | 5.0  |      | 6.3  |      |
|            |            |        | 0.9 | 1.6  |      | N.D. |      |
| <b>557</b> | <b>563</b> | 817.4  | 4.0 | 3.8  | 3.7  | N.D. | N.D. |
|            |            |        | 4.0 | 3.9  |      | N.D. |      |
|            |            |        | 0.6 | 1.6  |      | N.D. |      |
| <b>564</b> | <b>576</b> | 1532.7 | 5.8 | 7.5  | 7.9  | 7.3  | 7.0  |
|            |            |        | 5.8 | 6.9  |      | 7.5  |      |
|            |            |        | 5.9 | 6.8  |      | 7.4  |      |
| <b>577</b> | <b>585</b> | 1125.7 | 1.3 | 6.0  | 6.4  | 6.4  | 6.6  |
|            |            |        | 0.8 | 4.8  |      | 5.3  |      |
|            |            |        | 0.7 | 3.8  |      | 4.4  |      |
| <b>579</b> | <b>585</b> | 849.5  | 1.2 | 5.4  | 5.7  | 5.7  | N.D. |
|            |            |        | 0.9 | 4.1  |      | 4.7  |      |
|            |            |        | 0.7 | 3.4  |      | 4.0  |      |
| <b>596</b> | <b>610</b> | 1688.9 | 5.4 | 10.3 | 10.6 | N.D. | N.D. |
|            |            |        | 3.4 | 8.9  |      | N.D. |      |
|            |            |        | 1.2 | 8.0  |      | N.D. |      |
| <b>613</b> | <b>631</b> | 2281.1 | 8.3 | 12.1 | 12.6 | 13.0 | N.D. |
|            |            |        | 7.9 | 11.7 |      | 12.6 |      |
|            |            |        | 6.9 | 11.7 |      | 12.4 |      |
| <b>618</b> | <b>631</b> | 1669.9 | 6.1 | 9.7  | 10.2 | 10.3 | 10.8 |
|            |            |        | 5.6 | 9.1  |      | 9.9  |      |
|            |            |        | 4.7 | 8.8  |      | 9.8  |      |
| <b>625</b> | <b>631</b> | 864.5  | 1.6 | 4.1  | 4.4  | 3.9  | 3.6  |
|            |            |        | 1.4 | 3.7  |      | 3.9  |      |
|            |            |        | 0.9 | 3.5  |      | 3.8  |      |
| <b>632</b> | <b>642</b> | 1218.7 | 4.3 | 7.9  | 8.4  | N.D. | N.D. |
|            |            |        | 2.8 | 7.4  |      | N.D. |      |
|            |            |        | 2.1 | 6.9  |      | N.D. |      |

(1) ATP-free ADP, purified as described in ref. 12
