# Supplementary material
Source: PubMed Central journal article supplement (PMC2575452)
Supplement: 0804187105_ST2.pdf [file 0804187105_ST2.pdf]

Table S2

|            |            |        |      |      |      |      |      |      |      |      |      |      |      |      |      |  |
|------------|------------|--------|------|------|------|------|------|------|------|------|------|------|------|------|------|--|
|            |            |        | 3.5  | 4.8  | 5.7  | N.D. |      | N.D. |  |
| <b>534</b> | <b>550</b> | 1869.0 | 4.1  | 5.3  | 6.4  | 8.4  | 11.5 | 4.5  | 5.0  | 6.5  | 7.1  | 7.4  | 8.0  | 8.9  | 11.7 |  |
|            |            |        | 4.1  | 5.3  | 6.3  | N.D. |      | N.D. |      |  |
|            |            |        | N.D. | N.D. | N.D. | N.D. |      | 5.0  | 5.0  | 6.8  | 6.9  | 7.5  | 7.6  | 8.2  |      |  |
| <b>551</b> | <b>563</b> | 1559.8 | 0.1  | 0.3  | 1.3  | 7.9  | 8.2  | 0.3  | 0.4  | 1.2  | 4.8  | 7.3  | 8.2  | 8.1  | 9.1  |  |
|            |            |        | 0.0  | 0.0  | 0.1  | 2.4  |      | N.D. |      |  |
|            |            |        | 0.1  | 0.0  | 0.1  | 1.5  |      | 0.3  | 0.2  | 0.3  | 0.5  | 0.9  | 1.2  | N.D. |      |  |
| <b>557</b> | <b>563</b> | 817.4  | 0.1  | 0.2  | N.D. | N.D. | N.D. | 0.1  | 0.1  | 0.9  | 3.6  | N.D. | 4.3  | 4.3  | 4.2  |  |
|            |            |        | -0.2 | 0.1  | N.D. | N.D. |      | N.D. |      |  |
|            |            |        | 0.1  | 0.1  | N.D. | N.D. |      | 0.1  | 0.0  | 0.3  | 0.8  | N.D. | N.D. | N.D. |      |  |
| <b>564</b> | <b>576</b> | 1532.7 | 6.3  | 6.4  | 6.7  | 7.3  | 8.2  | 5.3  | 5.3  | 5.1  | 6.8  | 5.8  | 6.4  | 6.0  | 6.8  |  |
|            |            |        | 2.5  | 3.7  | 4.0  | 7.1  |      | N.D. |      |  |
|            |            |        | 1.8  | 2.0  | 2.5  | 6.4  |      | 1.5  | 1.6  | 2.7  | 5.0  | 5.2  | 6.0  | 6.2  |      |  |
| <b>577</b> | <b>585</b> | 1125.7 | 0.3  | 1.5  | 1.6  | 6.0  | 6.4  | 3.0  | 1.1  | 4.9  | 5.3  | 6.2  | 6.1  | 6.1  | 6.4  |  |
|            |            |        | 0.1  | 0.7  | 0.8  | 5.1  |      | N.D. |      |  |
|            |            |        | 0.1  | 0.7  | 0.7  | N.D. |      | 7.2  | N.D. | 7.4  | N.D. | 7.7  | N.D. | N.D. |      |  |
| <b>577</b> | <b>587</b> | 1383.7 | 1.2  | N.D. | 5.0  | N.D. | 7.5  | N.D. |  |
|            |            |        | 0.5  | 1.2  | 2.5  | N.D. |      | N.D. |      |  |
|            |            |        | 0.7  | 1.1  | 2.0  | N.D. |      | N.D. |      |  |
| <b>579</b> | <b>585</b> | 849.5  | 0.5  | 1.3  | 3.5  | 4.6  | 5.6  | 0.7  | 1.1  | 0.9  | N.D. | 0.6  | N.D. | 0.6  | N.D. |  |
|            |            |        | 0.5  | 0.8  | 1.1  | 2.9  |      | N.D. |      |  |
|            |            |        | 0.4  | 0.6  | 1.0  | 3.9  |      | 0.5  | 0.3  | 1.1  | 1.7  | 1.9  | N.D. | N.D. |      |  |
| <b>596</b> | <b>610</b> | 1688.9 | 0.9  | 2.9  | 7.9  | 10.3 | 10.5 | N.D. |  |
|            |            |        | 0.6  | 1.1  | 2.4  | 10.2 |      | N.D. |      |  |
|            |            |        | 0.6  | 0.8  | 1.9  | N.D. |      | N.D. |      |  |
| <b>613</b> | <b>631</b> | 2281.1 | 8.3  | 10.6 | 12.0 | 12.3 | 12.6 | N.D. |  |
|            |            |        | 4.7  | 5.7  | 7.3  | 12.4 |      | N.D. |      |  |
|            |            |        | 3.8  | 4.6  | 6.1  | 11.8 |      | N.D. |      |  |
| <b>618</b> | <b>631</b> | 1669.9 | 5.3  | 7.0  | 9.0  | 9.8  | 10.1 | 4.6  | 5.7  | 8.6  | 8.9  | 9.5  | 9.8  | 9.2  | 10.2 |  |
|            |            |        | 3.2  | 3.7  | 5.8  | 9.4  |      | N.D. |      |  |
|            |            |        | 2.9  | 3.1  | 4.2  | 8.7  |      | 3.3  | 3.4  | 4.0  | 6.1  | 6.3  | 8.2  | 8.3  |      |  |
| <b>625</b> | <b>631</b> | 864.5  | 1.2  | 2.2  | 3.6  | 4.0  | 4.3  | 1.2  | 1.8  | 2.6  | 3.6  | 3.2  | 3.4  | 3.2  | 3.6  |  |
|            |            |        | 0.4  | 0.8  | 1.4  | 3.7  |      | N.D. |      |  |
|            |            |        | 0.4  | 0.8  | 1.0  | 3.2  |      | 0.8  | 0.9  | 1.0  | 2.1  | 2.4  | 3.2  | 3.2  |      |  |
| <b>625</b> | <b>643</b> | 2178.2 | 4.8  | 6.5  | 8.1  | 10.9 | 13.8 | 5.5  | 6.9  | 8.5  | 9.4  | 10.2 | 10.9 | 12.3 | N.D. |  |
|            |            |        | 2.7  | 4.9  | 6.9  | 10.0 |      | N.D. |      |  |
|            |            |        | 2.5  | 4.0  | 5.5  | 9.6  |      | 2.7  | 3.8  | 5.8  | 7.5  | 8.5  | 8.9  | 9.9  |      |  |
| <b>632</b> | <b>642</b> | 1218.7 | 2.1  | 4.2  | 6.8  | 7.8  | 8.2  | 2.7  | 3.6  | 7.2  | 8.0  | 8.1  | 8.2  | 7.7  | 8.2  |  |
|            |            |        | 1.8  | 2.5  | 4.1  | 7.7  |      | N.D. |      |  |
|            |            |        | 1.7  | 2.8  | 4.0  | 7.6  |      | 1.9  | 2.8  | 4.1  | 6.8  | 7.1  | 7.6  | 7.8  |      |  |
| <b>632</b> | <b>646</b> | 1659.9 | 3.4  | 6.4  | N.D. | 11.2 | 11.8 | N.D. |  |
|            |            |        | 2.9  | 4.0  | N.D. | N.D. |      | N.D. |      |  |
|            |            |        | 2.6  | 3.9  | N.D. | N.D. |      | N.D. |      |  |
| <b>692</b> | <b>703</b> | 1461.6 | 2.5  | 3.0  | 3.5  | N.D. |  |
|            |            |        | 2.7  | 2.6  | 3.2  | N.D. |      | N.D. |      |  |
|            |            |        | 2.4  | 2.6  | 3.1  | N.D. |      | N.D. |      |  |
| <b>695</b> | <b>703</b> | 1128.5 | 4.7  | 4.9  | 4.8  | 4.9  | N.D. | 5.0  | 4.8  | 4.9  | 4.9  | 5.0  | 5.1  | 5.1  | N.D. |  |
|            |            |        | 4.6  | 4.9  | 4.7  | 4.6  |      | N.D. |      |  |
|            |            |        | 4.7  | 5.0  | N.D. | 5.0  |      | 4.8  | 4.7  | 4.8  | 4.9  | 5.0  | 4.9  | 5.3  |      |  |
