# Supplementary material
Source: PubMed Central journal article supplement (PMC2575452)
Supplement: 0804187105_ST3.pdf [file 0804187105_ST3.pdf]

**Table S3: Average number of deuterons incorporated in Sse2 + ATP and in Sse2-Strep-Tag II in complex with Ssa1-His<sub>10</sub>**

| PEPTIDE |         |                    | AVERAGE NUMBER OF DEUTERONS INCORPORATED |      |      |       |        |      |      |
|---------|---------|--------------------|------------------------------------------|------|------|-------|--------|------|------|
| Start   | End     | Mass (exp)<br>[Da] | HX time                                  | 10 s | 30 s | 2 min | 10 min | 2 h  | 100% |
| 26      | 39      | 1499.8             | Sse2 + ATP                               | 4.6  | 6.6  | 8.0   | 8.6    | 8.4  | 8.8  |
|         |         |                    | Sse2-Ssa1 complex                        | 2.9  | 2.7  | 3.9   | 5.7    | 8.0  |      |
| 31      | 39      | 959.5              |                                          | 2.4  | 3.5  | 4.0   | 4.1    | 4.1  | 4.4  |
|         |         |                    |                                          | 1.0  | 1.4  | 2.4   | 2.5    | 3.7  |      |
| 40      | 68      | 3192.7             |                                          | 13.4 | 15.2 | 16.6  | 18.1   | 18.7 | 19.1 |
|         |         |                    |                                          | 8.8  | 10.2 | 11.4  | 13.8   | 16.9 |      |
| 69      | 81      | 1589.9             |                                          | 2.6  | 2.9  | 3.6   | 5.1    | 6.2  | 7.8  |
|         |         |                    |                                          | 2.3  | 2.8  | 3.5   | 4.8    | 6.0  |      |
| 74      | 81      | 1022.5             |                                          | 1.8  | 2.0  | 2.3   | 3.1    | 3.5  | 3.4  |
|         |         |                    |                                          | 1.8  | 2.2  | 2.3   | 3.3    | 3.5  |      |
| 75      | 81      | 909.5              |                                          | 1.7  | 1.8  | 1.9   | 2.2    | 2.5  | 2.6  |
|         |         |                    |                                          | 1.6  | 1.6  | 1.7   | 2.1    | 2.4  |      |
| 93      | 103     | 1169.7             |                                          | 2.3  | 2.6  | 2.8   | 3.3    | 4.3  | 7.1  |
|         |         |                    |                                          | 2.2  | 2.4  | 2.6   | 3.2    | 4.1  |      |
| 104     | 118     | 1619.8             |                                          | 4.5  | 6.0  | 6.5   | 6.9    | 7.3  | 9.2  |
|         |         |                    |                                          | 4.3  | 5.6  | 6.1   | 6.7    | 7.0  |      |
| 106     | 118     | 1391.7             |                                          | 4.1  | 5.4  | 5.8   | 6.2    | 5.9  | 7.6  |
|         |         |                    |                                          | 3.8  | 5.1  | 5.6   | 5.8    | 5.9  |      |
| 122     | 140     | 2204.2             |                                          | 4.6  | 6.0  | 7.0   | 8.0    | 8.6  | 11.0 |
|         |         |                    |                                          | 4.0  | 4.9  | 6.0   | 7.4    | 8.3  |      |
| 123     | 142     | 2259.1             |                                          | 4.6  | 5.8  | 6.7   | 7.8    | 8.6  | 11.6 |
|         |         |                    |                                          | 3.9  | 4.5  | 5.9   | 7.2    | 8.4  |      |
| 144/145 | 159/160 | 1938.9             |                                          | 0.6  | 1.1  | 1.5   | 1.7    | 2.7  | 10.9 |
|         |         |                    |                                          | 0.6  | 1.1  | 1.3   | 1.7    | 2.6  |      |
| 156/158 | 165/167 | 970.5              |                                          | 3.5  | 3.9  | 4.3   | 5.2    | 5.4  | 5.6  |
|         |         |                    |                                          | 2.2  | 2.8  | 3.2   | 3.4    | 4.1  |      |
| 160     | 177     | 1849.0             |                                          | 0.3  | 0.5  | 0.9   | 1.9    | 2.6  | 12.6 |
|         |         |                    |                                          | 0.3  | 0.5  | 0.7   | 1.7    | 2.5  |      |
| 160     | 179     | 1991.1             |                                          | 0.3  | 0.4  | 0.8   | 1.8    | 2.6  | 13.8 |
|         |         |                    |                                          | 0.3  | 0.3  | 0.6   | 1.9    | 2.4  |      |
| 168     | 177     | 1082.6             |                                          | 0.3  | 0.4  | 0.9   | 1.6    | 1.8  | 8.7  |
|         |         |                    |                                          | 0.2  | 0.3  | N.D.  | 1.4    | 1.8  |      |
| 186     | 201     | 1775.0             |                                          | 2.6  | 3.1  | 3.4   | 3.6    | 3.5  | 7.3  |
|         |         |                    |                                          | 2.4  | 2.8  | 3.3   | 3.5    | 3.5  |      |
| 186     | 203     | 1989.1             |                                          | 2.6  | 3.1  | 3.5   | 3.5    | 3.4  | 8.7  |
|         |         |                    |                                          | 2.5  | 2.9  | 3.3   | 3.3    | 3.3  |      |
| 202     | 211     | 1094.5             |                                          | 0.2  | 0.2  | 0.2   | 0.4    | 0.7  | 4.9  |
|         |         |                    |                                          | N.D. | 0.2  | 0.3   | 0.2    | 0.4  |      |
| 202     | 212     | 1181.5             |                                          | 0.2  | 0.2  | 0.2   | 0.4    | 0.7  | 5.8  |
|         |         |                    |                                          | 0.1  | 0.2  | N.D.  | 0.1    | 0.2  |      |

Table S3

|            |            |        |  |      |      |     |      |      |      |
|------------|------------|--------|--|------|------|-----|------|------|------|
| <b>202</b> | <b>214</b> | 1425.6 |  | 0.3  | 0.3  | 0.3 | 0.4  | 0.8  | 7.4  |
|            |            |        |  | 0.2  | 0.3  | 0.3 | 0.2  | 0.3  |      |
| <b>215</b> | <b>221</b> | 837.4  |  | 1.0  | 1.2  | 1.5 | 1.7  | 1.9  | 4.0  |
|            |            |        |  | 0.8  | 1.2  | 1.3 | 1.4  | 1.6  |      |
| <b>215</b> | <b>236</b> | 2482.3 |  | 0.8  | 1.2  | 1.9 | 3.3  | 4.7  | 12.7 |
|            |            |        |  | 0.8  | 1.1  | 1.8 | 3.1  | 4.6  |      |
| <b>216</b> | <b>227</b> | 1335.7 |  | 0.6  | 0.8  | 1.3 | 2.0  | 3.1  | 7.5  |
|            |            |        |  | 0.5  | 0.8  | 0.9 | 1.8  | 3.2  |      |
| <b>222</b> | <b>236</b> | 1662.8 |  | 0.5  | 0.9  | 1.3 | 2.3  | 2.5  | 7.8  |
|            |            |        |  | 0.7  | 1.1  | 1.5 | 2.2  | 2.5  |      |
| <b>222</b> | <b>240</b> | 2152.1 |  | 0.6  | 1.0  | 1.3 | 2.1  | 2.7  | 9.9  |
|            |            |        |  | 0.6  | 1.1  | 1.4 | 1.9  | 2.6  |      |
| <b>237</b> | <b>243</b> | 850.4  |  | 0.2  | 0.3  | 0.3 | 0.3  | 0.6  | 3.9  |
|            |            |        |  | 0.3  | 0.3  | 0.5 | 0.3  | 0.6  |      |
| <b>269</b> | <b>289</b> | 2216.2 |  | 4.4  | 4.9  | 5.7 | 6.4  | 7.6  | 14.8 |
|            |            |        |  | 3.5  | 3.9  | 4.5 | 5.9  | 7.7  |      |
| <b>271</b> | <b>289</b> | 2032.1 |  | 4.2  | 4.6  | 5.4 | 7.6  | 10.0 | 12.5 |
|            |            |        |  | 3.1  | 3.4  | 4.2 | 5.7  | 7.8  |      |
| <b>272</b> | <b>289</b> | 1961.1 |  | 4.1  | 4.7  | 5.3 | 7.5  | 9.6  | 11.7 |
|            |            |        |  | 3.1  | 3.4  | 4.2 | 5.8  | 7.3  |      |
| <b>293</b> | <b>301</b> | 990.4  |  | 1.4  | 1.6  | 2.2 | 3.4  | 4.1  | 4.4  |
|            |            |        |  | 1.4  | 1.8  | 2.3 | 3.3  | 4.1  |      |
| <b>309</b> | <b>314</b> | 682.4  |  | 0.1  | N.D. | 0.5 | 0.9  | 2.1  | 2.4  |
|            |            |        |  | N.D. | N.D. | 0.5 | 1.2  | 2.1  |      |
| <b>309</b> | <b>325</b> | 1939.1 |  | 2.7  | 3.6  | 4.9 | 6.6  | 8.3  | 11.2 |
|            |            |        |  | 2.6  | 3.6  | 4.9 | 6.6  | 8.1  |      |
| <b>309</b> | <b>330</b> | 2450.4 |  | 2.6  | 3.6  | 5.1 | 7.3  | 10.6 | 15.8 |
|            |            |        |  | 2.5  | 3.4  | 4.9 | 7.1  | 9.8  |      |
| <b>315</b> | <b>330</b> | 1786.0 |  | 1.7  | 2.2  | 2.6 | 3.9  | 6.0  | 11.2 |
|            |            |        |  | 1.6  | 1.8  | 2.4 | 4.0  | 6.1  |      |
| <b>315</b> | <b>337</b> | 2590.4 |  | 3.3  | 3.7  | 4.6 | 6.7  | 10.7 | 17.1 |
|            |            |        |  | 3.5  | 4.0  | 5.0 | 7.0  | 11.1 |      |
| <b>331</b> | <b>337</b> | 822.4  |  | 0.7  | 0.8  | 0.9 | 1.2  | 2.4  | 3.2  |
|            |            |        |  | 0.7  | 0.8  | 0.9 | 1.2  | 2.4  |      |
| <b>337</b> | <b>350</b> | 1513.9 |  | 0.7  | 1.5  | 1.7 | 3.3  | 5.5  | 8.3  |
|            |            |        |  | N.D. | N.D. | 1.6 | 1.6  | N.D. |      |
| <b>337</b> | <b>357</b> | 2271.3 |  | 0.7  | 1.5  | 1.7 | 3.2  | 7.2  | 15.3 |
|            |            |        |  | 0.6  | N.D. | 1.4 | N.D. | N.D. |      |
| <b>338</b> | <b>357</b> | 2124.2 |  | 0.8  | 1.1  | 1.6 | 2.7  | 7.2  | 13.8 |
|            |            |        |  | 0.6  | 0.9  | 1.2 | 1.4  | 3.4  |      |
| <b>338</b> | <b>366</b> | 3054.8 |  | 3.2  | 4.8  | 5.8 | 7.7  | 12.7 | 19.9 |
|            |            |        |  | 1.1  | 1.8  | 3.1 | 4.9  | 8.3  |      |
| <b>351</b> | <b>366</b> | 1706.0 |  | 2.0  | 3.3  | 4.1 | 4.7  | 5.5  | 9.5  |
|            |            |        |  | 1.4  | 1.2  | 2.5 | 3.8  | 5.4  |      |
| <b>358</b> | <b>366</b> | 948.5  |  | 2.4  | 3.5  | 4.0 | 5.2  | 5.3  | 5.0  |
|            |            |        |  | 0.8  | 1.2  | 2.0 | 3.5  | 4.9  |      |
| <b>358</b> | <b>378</b> | 2150.1 |  | 4.8  | 6.7  | 7.2 | 7.8  | 9.5  | 13.2 |
|            |            |        |  | 2.6  | 3.8  | 5.5 | 7.0  | 8.6  |      |
| <b>367</b> | <b>378</b> | 1219.6 |  | 1.0  | 1.3  | 1.7 | 2.0  | 2.7  | 6.9  |
|            |            |        |  | 0.7  | 1.4  | 1.7 | 1.9  | 2.5  |      |
| <b>379</b> | <b>387</b> | 953.5  |  | 2.7  | 2.8  | 2.8 | 3.1  | 3.8  | 4.2  |
|            |            |        |  | 2.0  | 2.3  | 2.6 | 2.8  | 3.0  |      |

Table S3

|            |            |        |  |     |      |      |      |      |      |
|------------|------------|--------|--|-----|------|------|------|------|------|
| <b>379</b> | <b>394</b> | 1884.0 |  | 6.5 | 7.0  | 7.3  | 8.1  | 8.8  | 9.2  |
|            |            |        |  | 4.8 | 6.2  | 6.8  | 7.4  | 8.0  |      |
| <b>388</b> | <b>394</b> | 948.6  |  | 2.3 | 2.8  | 3.1  | 3.5  | 3.5  | 3.6  |
|            |            |        |  | 1.5 | 2.0  | 2.6  | 3.0  | 3.5  |      |
| <b>388</b> | <b>403</b> | 1954.0 |  | 3.0 | 3.5  | 4.0  | 4.7  | 6.0  | 8.9  |
|            |            |        |  | 2.4 | 3.3  | 3.7  | 4.5  | 6.3  |      |
| <b>388</b> | <b>405</b> | 2218.1 |  | 2.9 | 3.3  | 3.7  | 4.6  | 5.9  | 10.2 |
|            |            |        |  | 2.3 | 2.8  | 3.4  | 4.0  | 6.0  |      |
| <b>404</b> | <b>413</b> | 1297.5 |  | 3.4 | 3.7  | 3.7  | 4.0  | 4.3  | 5.0  |
|            |            |        |  | 3.1 | 3.4  | N.D. | 3.8  | 4.3  |      |
| <b>404</b> | <b>416</b> | 1681.8 |  | 4.0 | 4.7  | 5.0  | 5.7  | 6.4  | 6.6  |
|            |            |        |  | 3.9 | 4.4  | 4.9  | 5.5  | 6.2  |      |
| <b>406</b> | <b>416</b> | 1417.6 |  | 3.6 | 4.1  | 4.4  | 4.8  | 5.0  | 5.3  |
|            |            |        |  | 3.5 | 4.0  | 4.3  | 4.7  | 4.9  |      |
| <b>417</b> | <b>430</b> | 1538.8 |  | 3.0 | 3.0  | 3.1  | 4.3  | 5.7  | 7.0  |
|            |            |        |  | 3.0 | 3.0  | 3.3  | 4.2  | 5.7  |      |
| <b>431</b> | <b>439</b> | 1058.5 |  | 1.5 | 1.9  | 2.2  | 2.4  | 2.3  | 4.1  |
|            |            |        |  | 1.5 | 1.8  | 2.4  | 2.2  | 2.2  |      |
| <b>431</b> | <b>441</b> | 1276.6 |  | 1.6 | 2.4  | 2.9  | 3.3  | 3.2  | 5.5  |
|            |            |        |  | 1.9 | 2.4  | 2.8  | 3.0  | 3.2  |      |
| <b>434</b> | <b>441</b> | 949.4  |  | 1.2 | 1.8  | 2.2  | 2.4  | 2.4  | 3.8  |
|            |            |        |  | 1.1 | 1.8  | 2.1  | 2.2  | 2.3  |      |
| <b>442</b> | <b>458</b> | 1815.0 |  | 5.9 | 6.4  | 6.4  | 7.5  | 7.5  | 9.4  |
|            |            |        |  | 5.7 | 6.3  | 6.4  | 7.0  | 7.8  |      |
| <b>467</b> | <b>482</b> | 1852.1 |  | 3.2 | 3.4  | 3.9  | N.D. | N.D. | N.D. |
|            |            |        |  | 3.3 | 3.3  | 3.9  | N.D. | N.D. |      |
| <b>490</b> | <b>495</b> | 695.4  |  | 0.9 | 1.2  | 1.8  | 2.4  | 2.7  | 2.8  |
|            |            |        |  | 1.0 | 1.3  | 1.9  | 2.2  | 2.8  |      |
| <b>501</b> | <b>515</b> | 1632.8 |  | 2.3 | 2.7  | 3.1  | 4.7  | 6.7  | 8.9  |
|            |            |        |  | 2.4 | 2.6  | 3.2  | 4.8  | 6.6  |      |
| <b>501</b> | <b>521</b> | 2320.1 |  | 7.6 | 8.6  | 8.6  | 9.0  | 8.8  | 8.8  |
|            |            |        |  | 7.0 | 8.4  | 8.5  | 8.8  | 8.7  |      |
| <b>522</b> | <b>535</b> | 1588.9 |  | 7.2 | 7.8  | 8.3  | 8.9  | 8.7  | 8.6  |
|            |            |        |  | 6.8 | 7.4  | 8.3  | 8.5  | 8.6  |      |
| <b>522</b> | <b>539</b> | 1990.2 |  | 9.6 | 10.4 | 11.0 | 12.4 | 12.4 | 12.2 |
|            |            |        |  | 9.3 | 10.1 | 11.0 | 11.9 | 12.3 |      |
| <b>540</b> | <b>546</b> | 788.4  |  | 1.6 | 2.0  | 2.3  | 2.5  | 2.4  | 3.3  |
|            |            |        |  | 1.6 | 2.0  | 2.6  | 2.6  | 2.8  |      |
| <b>540</b> | <b>547</b> | 901.5  |  | 1.7 | 2.0  | 2.3  | 2.4  | 2.8  | 3.9  |
|            |            |        |  | 1.6 | 2.1  | 2.1  | 2.3  | 2.6  |      |
| <b>540</b> | <b>549</b> | 1130.6 |  | 1.9 | 2.3  | 2.9  | 3.5  | 3.8  | 4.9  |
|            |            |        |  | 2.1 | 2.5  | 3.0  | 3.5  | 3.7  |      |
| <b>540</b> | <b>550</b> | 1243.6 |  | 1.9 | 2.4  | 3.0  | 3.5  | 4.4  | 6.0  |
|            |            |        |  | 2.0 | 2.4  | 2.9  | 3.5  | 4.3  |      |
| <b>550</b> | <b>563</b> | 1740.9 |  | 1.3 | 2.4  | 4.6  | 6.0  | 7.9  | 8.3  |
|            |            |        |  | 0.7 | 0.8  | 0.9  | 2.7  | 5.5  |      |
| <b>551</b> | <b>563</b> | 1627.8 |  | 1.2 | 2.5  | 4.3  | 5.9  | 7.5  | 7.7  |
|            |            |        |  | 0.6 | 1.0  | 1.4  | 2.8  | 5.1  |      |
| <b>593</b> | <b>605</b> | 1475.8 |  | 1.0 | 1.4  | 3.0  | 5.6  | 7.2  | 7.8  |
|            |            |        |  | 1.0 | 1.5  | 2.7  | 4.1  | 6.0  |      |
| <b>611</b> | <b>624</b> | 1617.7 |  | 5.1 | 6.0  | 6.5  | 6.4  | 6.2  | 6.6  |
|            |            |        |  | 3.9 | 4.8  | 5.4  | 5.8  | 6.4  |      |

Table S3

|            |            |        |  |      |      |      |      |      |      |
|------------|------------|--------|--|------|------|------|------|------|------|
| <b>625</b> | <b>631</b> | 864.4  |  | 0.2  | 0.5  | 1.8  | 3.5  | 3.8  | 4.0  |
|            |            |        |  | 0.1  | 0.2  | 0.5  | 1.5  | 2.9  |      |
| <b>632</b> | <b>642</b> | 1218.7 |  | 2.3  | 4.5  | 6.7  | 7.7  | 7.6  | 8.2  |
|            |            |        |  | 2.2  | 3.1  | 5.0  | 7.0  | 7.9  |      |
| <b>632</b> | <b>655</b> | 2741.6 |  | 11.4 | 14.5 | 17.1 | 18.3 | 18.2 | 18.3 |
|            |            |        |  | 10.1 | 12.2 | 15.2 | 17.4 | 18.2 |      |
| <b>654</b> | <b>664</b> | 1292.6 |  | 6.0  | 6.4  | 6.0  | 6.2  | 6.0  | 6.8  |
|            |            |        |  | 5.8  | 6.2  | 6.1  | 6.0  | 5.7  |      |
| <b>670</b> | <b>690</b> | 2379.0 |  | 10.1 | 11.2 | 10.5 | 10.6 | 10.1 | 10.4 |
|            |            |        |  | 9.8  | 10.6 | 10.5 | 10.2 | 10.1 |      |
