# Supplementary material
Source: PubMed Central journal article supplement (PMC2575452)
Supplement: 0804187105_ST4.pdf [file 0804187105_ST4.pdf]

**Table S4: Average number of deuterons incorporated in Ssa1-NBD in the presence and absence of ATP**

| PEPTIDE |     |                    | AVERAGE NUMBER OF DEUTERONS INCORPORATED |      |       |
|---------|-----|--------------------|------------------------------------------|------|-------|
| Start   | End | Mass (exp)<br>[Da] | HX time:                                 | 10 s | 2 min |
| 16      | 39  | 2657.3             | Ssa1-NBD <sup>(1)</sup>                  | 4.8  | 10.0  |
|         |     |                    | Ssa1-NBD + ATP 1 mM                      | 5.3  | 10.3  |
| 23      | 39  | 1903.0             |                                          | 4.7  | 6.8   |
|         |     |                    |                                          | 4.9  | 7.0   |
| 40      | 45  | 652.3              |                                          | 1.8  | 1.9   |
|         |     |                    |                                          | 1.7  | 1.8   |
| 40      | 48  | 1050.5             |                                          | 3.5  | 3.6   |
|         |     |                    |                                          | 3.5  | 3.6   |
| 46      | 66  | 2246.1             |                                          | 8.0  | 9.6   |
|         |     |                    |                                          | 7.7  | 9.6   |
| 49      | 63  | 1500.7             |                                          | 6.0  | 7.5   |
|         |     |                    |                                          | 5.5  | 7.2   |
| 49      | 66  | 1847.9             |                                          | 6.5  | 7.8   |
|         |     |                    |                                          | 6.2  | 7.9   |
| 67      | 83  | 1942.0             |                                          | N.D. | 5.0   |
|         |     |                    |                                          | N.D. | 4.8   |
| 83      | 92  | 1232.6             |                                          | 1.4  | 2.0   |
|         |     |                    |                                          | 1.7  | 2.0   |
| 93      | 105 | 1486.8             |                                          | 1.4  | N.D.  |
|         |     |                    |                                          | 1.2  | N.D.  |
| 105     | 119 | 1711.8             |                                          | 2.1  | 3.1   |
|         |     |                    |                                          | 2.1  | 3.2   |
| 105     | 120 | 1842.9             |                                          | 2.4  | 3.3   |
|         |     |                    |                                          | 2.4  | 3.3   |
| 106     | 119 | 1564.8             |                                          | 1.8  | 3.4   |
|         |     |                    |                                          | 1.9  | 3.3   |
| 120     | 133 | 1598.8             |                                          | 0.1  | 0.4   |
|         |     |                    |                                          | 0.1  | 0.7   |
| 121     | 130 | 1104.6             |                                          | 0.0  | 0.1   |
|         |     |                    |                                          | 0.0  | 0.2   |
| 121     | 133 | 1467.7             |                                          | 0.3  | 0.5   |
|         |     |                    |                                          | 0.4  | 0.4   |
| 123     | 133 | 1255.6             |                                          | 0.1  | 0.4   |
|         |     |                    |                                          | 0.1  | 0.5   |
| 132     | 139 | 878.4              |                                          | 1.9  | 3.4   |
|         |     |                    |                                          | 1.8  | 3.2   |
| 140     | 147 | 818.4              |                                          | 0.0  | 0.2   |
|         |     |                    |                                          | 0.6  | 0.9   |
| 140     | 165 | 2692.4             |                                          | 1.9  | 3.9   |
|         |     |                    |                                          | 2.5  | 4.5   |
| 148     | 165 | 1892.0             |                                          | 1.1  | 1.8   |
|         |     |                    |                                          | 1.0  | 1.8   |
| 149     | 165 | 1744.8             |                                          | 1.0  | 1.6   |
|         |     |                    |                                          | 1.0  | 1.9   |

|            |            |        |  |     |     |
|------------|------------|--------|--|-----|-----|
| <b>168</b> | <b>178</b> | 1167.6 |  | 2.2 | 2.3 |
|            |            |        |  | 2.2 | 2.2 |
| <b>169</b> | <b>178</b> | 1054.6 |  | 1.4 | 1.5 |
|            |            |        |  | 1.3 | 1.4 |
| <b>207</b> | <b>214</b> | 892.4  |  | 1.8 | 2.9 |
|            |            |        |  | 1.7 | 2.8 |
| <b>215</b> | <b>229</b> | 1498.7 |  | 2.5 | 4.5 |
|            |            |        |  | 2.1 | 3.2 |
| <b>216</b> | <b>229</b> | 1369.6 |  | 2.4 | 4.0 |
|            |            |        |  | 2.1 | 2.7 |
| <b>230</b> | <b>241</b> | 1530.7 |  | 0.5 | 1.9 |
|            |            |        |  | 0.3 | 0.6 |
| <b>242</b> | <b>254</b> | 1605.9 |  | 3.8 | 5.1 |
|            |            |        |  | 3.5 | 4.8 |
| <b>242</b> | <b>256</b> | 1833.0 |  | 5.5 | 7.8 |
|            |            |        |  | 4.9 | 7.7 |
| <b>265</b> | <b>280</b> | 1748.9 |  | 4.7 | 7.6 |
|            |            |        |  | 3.6 | 5.1 |
| <b>266</b> | <b>280</b> | 1619.9 |  | 4.5 | 6.4 |
|            |            |        |  | 3.6 | 4.4 |
| <b>285</b> | <b>290</b> | 726.3  |  | 1.0 | 1.6 |
|            |            |        |  | 0.8 | 1.2 |
| <b>307</b> | <b>315</b> | 1062.5 |  | 1.2 | 1.5 |
|            |            |        |  | 0.8 | 0.9 |
| <b>307</b> | <b>323</b> | 1986.1 |  | 0.4 | 1.1 |
|            |            |        |  | 0.4 | 0.8 |
| <b>307</b> | <b>330</b> | 2787.5 |  | 1.7 | 3.2 |
|            |            |        |  | 1.5 | 2.7 |
| <b>316</b> | <b>323</b> | 941.6  |  | 0.6 | 0.7 |
|            |            |        |  | 0.6 | 0.4 |
| <b>316</b> | <b>330</b> | 1742.9 |  | 1.3 | 2.0 |
|            |            |        |  | 1.2 | 1.7 |
| <b>331</b> | <b>346</b> | 1707.1 |  | 1.8 | 3.8 |
|            |            |        |  | 0.5 | 1.2 |
| <b>331</b> | <b>348</b> | 1907.2 |  | 1.4 | 3.5 |
|            |            |        |  | 0.4 | 1.6 |
| <b>331</b> | <b>349</b> | 2022.2 |  | 1.5 | 3.7 |
|            |            |        |  | 0.5 | 1.6 |
| <b>334</b> | <b>346</b> | 1381.8 |  | 1.4 | 3.3 |
|            |            |        |  | 0.6 | 1.0 |
| <b>334</b> | <b>349</b> | 1697.0 |  | 1.5 | 3.5 |
|            |            |        |  | 0.5 | 1.0 |
| <b>347</b> | <b>364</b> | 2094.0 |  | 4.7 | 6.8 |
|            |            |        |  | 4.8 | 6.8 |
| <b>349</b> | <b>365</b> | 1964.9 |  | 4.5 | 6.7 |
|            |            |        |  | 4.8 | 6.7 |
| <b>350</b> | <b>364</b> | 1778.8 |  | 4.7 | 6.8 |
|            |            |        |  | 4.5 | 6.4 |
| <b>365</b> | <b>373</b> | 848.4  |  | 0.1 | 0.1 |
|            |            |        |  | 0.1 | 0.1 |
| <b>366</b> | <b>373</b> | 777.4  |  | 0.1 | 0.1 |
|            |            |        |  | 0.0 | 0.0 |

(1) The data for Ssa-NBD corresponds to that of Table S5, dataset 2
