# Supplementary material
Source: PubMed Central journal article supplement (PMC2575452)
Supplement: 0804187105_ST5.pdf [file 0804187105_ST5.pdf]

**Table S5: Average number of deuterons incorporated in Ssa1-NBD, and in Ssa1-NBD or Ssa1-His<sub>10</sub> in complex with Sse1-Strep-Tag II**

| PEPTIDE |     |                    | AVERAGE NUMBER OF DEUTERONS INCORPORATED |      |      |       |      |      |           |      |       |        |      |      |
|---------|-----|--------------------|------------------------------------------|------|------|-------|------|------|-----------|------|-------|--------|------|------|
|         |     |                    | DATASET 1                                |      |      |       |      |      | DATASET 2 |      |       |        |      |      |
| Start   | End | Mass (exp)<br>[Da] | HX time                                  | 10 s | 30 s | 2 min | 2 h  | 100% | 10 s      | 30 s | 2 min | 10 min | 2 h  | 100% |
| 1       | 8   | 819.4              | Ssa1-NBD                                 | 2.5  | 2.7  | 2.6   | 2.8  | 4.7  | N.D.      | N.D. | N.D.  | N.D.   | N.D. | N.D. |
|         |     |                    | Ssa1-NBD-Sse1                            | 2.8  | 3.5  | 2.8   | 2.5  |      | N.D.      | N.D. | N.D.  | N.D.   | N.D. |      |
|         |     |                    | Ssa1-Sse1                                | N.D. | N.D. | N.D.  | N.D. |      | N.D.      | N.D. | N.D.  | N.D.   | N.D. |      |
| 2       | 15  | 1413.7             |                                          | N.D. | N.D. | N.D.  | N.D. | N.D. | N.D.      | N.D. | N.D.  | N.D.   | N.D. | N.D. |
|         |     |                    |                                          | N.D. | N.D. | N.D.  | N.D. |      | N.D.      | N.D. | N.D.  | N.D.   | N.D. |      |
|         |     |                    |                                          | N.D. | N.D. | N.D.  | N.D. |      | N.D.      | N.D. | N.D.  | N.D.   | N.D. |      |
| 16      | 39  | 2657.3             |                                          | 4.9  | 7.6  | 9.5   | 11.6 | N.D. | 4.8       | 7.5  | 10.0  | 12.2   | 11.0 | N.D. |
|         |     |                    |                                          | 4.8  | 6.2  | 7.8   | 11.8 |      | N.D.      | N.D. | N.D.  | N.D.   | N.D. |      |
|         |     |                    |                                          | 3.6  | N.D. | 7.3   | 11.3 |      | 3.5       | 4.6  | 7.8   | N.D.   | N.D. |      |
| 23      | 39  | 1903.0             |                                          | 4.3  | 5.8  | 6.4   | 8.0  | 10.4 | 4.7       | 5.6  | 6.8   | 7.9    | 7.3  | 9.0  |
|         |     |                    |                                          | 4.2  | 4.9  | 5.6   | 8.3  |      | N.D.      | N.D. | N.D.  | N.D.   | N.D. |      |
|         |     |                    |                                          | 4.0  | 4.4  | 5.2   | 8.0  |      | 4.1       | 4.6  | 5.3   | N.D.   | 7.2  |      |
| 40      | 45  | 652.3              |                                          | 2.0  | 1.9  | 1.9   | 2.7  | 3.8  | 1.8       | 1.9  | 1.9   | 2.5    | 2.6  | 3.4  |
|         |     |                    |                                          | 2.0  | 2.2  | 2.1   | 2.6  |      | N.D.      | N.D. | N.D.  | N.D.   | N.D. |      |
|         |     |                    |                                          | 1.9  | 2.1  | 2.2   | 2.7  |      | 1.9       | 1.8  | 2.0   | 2.6    | 2.5  |      |
| 40      | 48  | 1050.5             |                                          | 3.5  | 3.6  | 3.3   | 4.5  | 5.9  | 3.5       | 3.7  | 3.6   | 4.2    | 4.5  | 5.7  |
|         |     |                    |                                          | 3.7  | 3.8  | 3.7   | 4.4  |      | N.D.      | N.D. | N.D.  | N.D.   | N.D. |      |
|         |     |                    |                                          | 3.7  | 3.6  | 3.6   | 4.5  |      | 3.6       | 3.6  | 3.9   | 4.2    | 4.3  |      |
| 46      | 66  | 2246.1             |                                          | 7.5  | 8.6  | 8.9   | 11.7 | 14.2 | 8.0       | 8.5  | 9.6   | 10.9   | 10.4 | 13.0 |
|         |     |                    |                                          | 6.7  | 7.8  | 8.6   | 10.4 |      | N.D.      | N.D. | N.D.  | N.D.   | N.D. |      |
|         |     |                    |                                          | 6.1  | 8.1  | 8.6   | 10.9 |      | 7.3       | 7.5  | 9.0   | 9.7    | 10.4 |      |
| 49      | 63  | 1500.7             |                                          | 6.4  | 7.7  | 7.4   | 8.8  | 8.7  | 6.0       | N.D. | 7.5   | N.D.   | 8.3  | 8.6  |
|         |     |                    |                                          | 4.9  | 5.8  | 6.6   | 8.2  |      | N.D.      | N.D. | N.D.  | N.D.   | N.D. |      |
|         |     |                    |                                          | 4.5  | 5.5  | 6.1   | 8.5  |      | 4.0       | 4.9  | 5.5   | N.D.   | 6.1  |      |
| 49      | 66  | 1847.9             |                                          | 6.5  | 7.6  | 7.9   | 10.0 | 11.6 | 6.5       | 7.4  | 7.8   | 9.4    | 8.3  | 10.3 |
|         |     |                    |                                          | 4.9  | 5.9  | 6.7   | 9.0  |      | N.D.      | N.D. | N.D.  | N.D.   | N.D. |      |
|         |     |                    |                                          | 5.5  | 5.8  | 6.8   | 9.2  |      | 3.7       | 4.0  | 5.7   | N.D.   | 7.8  |      |
| 67      | 83  | 1942.0             |                                          | 2.2  | 4.4  | 4.7   | 7.8  | 11.1 | N.D.      | N.D. | 5.0   | N.D.   | N.D. | N.D. |
|         |     |                    |                                          | 2.6  | 4.5  | 5.0   | 7.9  |      | N.D.      | N.D. | N.D.  | N.D.   | N.D. |      |
|         |     |                    |                                          | 2.7  | 5.4  | 5.8   | 8.7  |      | N.D.      | N.D. | N.D.  | N.D.   | N.D. |      |
| 76      | 92  | 2062.0             |                                          | 3.7  | 4.8  | 6.0   | 9.0  | 10.4 | N.D.      | N.D. | N.D.  | N.D.   | N.D. | N.D. |
|         |     |                    |                                          | 3.5  | 4.5  | 5.8   | 8.6  |      | N.D.      | N.D. | N.D.  | N.D.   | N.D. |      |
|         |     |                    |                                          | 3.5  | 4.8  | 6.6   | 8.7  |      | N.D.      | N.D. | N.D.  | N.D.   | N.D. |      |
| 83      | 92  | 1232.6             |                                          | 1.6  | 2.0  | 2.3   | 3.9  | 5.0  | 1.4       | 0.9  | 2.0   | 2.9    | 2.0  | 3.5  |
|         |     |                    |                                          | 1.8  | 2.0  | 2.4   | 3.5  |      | N.D.      | N.D. | N.D.  | N.D.   | N.D. |      |
|         |     |                    |                                          | 1.9  | 2.2  | 2.7   | 3.5  |      | 1.8       | 2.1  | 2.2   | 2.9    | 2.2  |      |
| 83      | 104 | 2554.3             |                                          | 2.2  | 2.9  | 3.9   | 8.9  | 13.3 | 7.9       | 0.1  | 12.8  | N.D.   | N.D. | N.D. |
|         |     |                    |                                          | 2.3  | 3.0  | 3.8   | 8.1  |      | N.D.      | N.D. | N.D.  | N.D.   | N.D. |      |
|         |     |                    |                                          | 2.2  | 2.9  | 3.8   | 9.4  |      | N.D.      | N.D. | N.D.  | N.D.   | N.D. |      |
| 93      | 102 | 1111.6             |                                          | 0.8  | 1.0  | 1.1   | 1.9  | 5.4  | N.D.      | N.D. | N.D.  | N.D.   | N.D. | N.D. |
|         |     |                    |                                          | 0.8  | 1.0  | 1.1   | 1.8  |      | N.D.      | N.D. | N.D.  | N.D.   | N.D. |      |
|         |     |                    |                                          | 0.9  | 1.0  | 1.2   | 1.9  |      | N.D.      | N.D. | N.D.  | N.D.   | N.D. |      |

Table S5

|            |            |        |      |     |     |     |      |      |      |      |      |      |      |
|------------|------------|--------|------|-----|-----|-----|------|------|------|------|------|------|------|
| <b>93</b>  | <b>104</b> | 1339.7 | 0.9  | 1.1 | 1.3 | 3.5 | 7.2  | N.D. | N.D. | N.D. | N.D. | N.D. | N.D. |
|            |            |        | 0.8  | 0.8 | 1.1 | 3.0 |      | N.D. | N.D. | N.D. | N.D. | N.D. |      |
|            |            |        | N.D. | 1.0 | 1.1 | 3.8 |      | N.D. | N.D. | N.D. | N.D. | N.D. |      |
| <b>105</b> | <b>119</b> | 1711.8 | 2.4  | 3.1 | 3.3 | 5.9 | 9.4  | 2.1  | 2.5  | 3.1  | N.D. | 5.6  | 9.1  |
|            |            |        | 2.4  | 3.0 | 3.4 | 5.7 |      | N.D. | N.D. | N.D. | N.D. | N.D. |      |
|            |            |        | 2.5  | 3.2 | 3.6 | 6.3 |      | 2.2  | N.D. | 3.2  | N.D. | 5.9  |      |
| <b>105</b> | <b>120</b> | 1842.9 | 2.3  | 3.0 | 3.2 | 6.0 | 10.4 | 2.4  | N.D. | 3.3  | N.D. | N.D. | 10.0 |
|            |            |        | 2.4  | 3.2 | 3.3 | 5.9 |      | N.D. | N.D. | N.D. | N.D. | N.D. |      |
|            |            |        | 2.5  | 3.2 | 3.4 | 6.2 |      | N.D. | N.D. | 3.6  | N.D. | N.D. |      |
| <b>106</b> | <b>119</b> | 1564.8 | 1.9  | 2.5 | 2.7 | 5.2 | 8.7  | 1.8  | 2.3  | 3.4  | 3.5  | 5.5  | 7.9  |
|            |            |        | 1.9  | 2.3 | 2.6 | 5.1 |      | N.D. | N.D. | N.D. | N.D. | N.D. |      |
|            |            |        | 1.9  | 2.5 | 2.6 | 5.8 |      | 2.1  | 2.4  | 2.8  | N.D. | 5.3  |      |
| <b>120</b> | <b>133</b> | 1598.8 | 0.2  | 0.2 | 0.7 | 4.9 | 10.4 | 0.1  | 0.2  | 0.4  | 1.7  | 4.7  | 10.2 |
|            |            |        | 0.4  | 0.3 | 0.4 | 2.3 |      | N.D. | N.D. | N.D. | N.D. | N.D. |      |
|            |            |        | 0.1  | 0.4 | 0.4 | 2.0 |      | 0.5  | 0.7  | 0.8  | 0.8  | N.D. |      |
| <b>121</b> | <b>130</b> | 1104.6 | 0.1  | 0.1 | 0.2 | 1.7 | 6.2  | 0.0  | 0.2  | 0.1  | N.D. | 1.5  | 5.5  |
|            |            |        | 0.1  | 0.1 | 0.2 | 0.8 |      | N.D. | N.D. | N.D. | N.D. | N.D. |      |
|            |            |        | 0.1  | 0.1 | 0.2 | 1.0 |      | 0.2  | 0.1  | 0.0  | N.D. | 1.3  |      |
| <b>123</b> | <b>133</b> | 1255.6 | 0.2  | 0.3 | 0.7 | 3.8 | 7.2  | 0.1  | 0.0  | 0.4  | N.D. | N.D. | 7.2  |
|            |            |        | 0.2  | 0.2 | 0.3 | 1.7 |      | N.D. | N.D. | N.D. | N.D. | N.D. |      |
|            |            |        | 0.1  | 0.2 | 0.3 | 1.8 |      | 0.1  | N.D. | 0.2  | N.D. | N.D. |      |
| <b>140</b> | <b>147</b> | 818.4  | 0.3  | 0.2 | 0.7 | 1.1 | 3.8  | 0.0  | -0.1 | 0.2  | 2.1  | 1.4  | 4.2  |
|            |            |        | 0.3  | 0.7 | 0.8 | 0.8 |      | N.D. | N.D. | N.D. | N.D. | N.D. |      |
|            |            |        | N.D. | 0.6 | 1.1 | 1.4 |      | 0.1  | 0.3  | 0.6  | N.D. | 1.3  |      |
| <b>140</b> | <b>165</b> | 2692.4 | 2.0  | 2.5 | 3.5 | 8.8 | 18.2 | 1.9  | 1.9  | 3.9  | 6.2  | 8.7  | 18.3 |
|            |            |        | 2.3  | 3.2 | 4.4 | 8.9 |      | N.D. | N.D. | N.D. | N.D. | N.D. |      |
|            |            |        | 2.6  | 3.8 | 4.8 | 9.2 |      | 2.3  | 2.9  | 4.6  | 6.7  | 8.8  |      |
| <b>148</b> | <b>165</b> | 1892.0 | 1.4  | 1.8 | 2.1 | 5.0 | 12.1 | 1.1  | 1.3  | 1.8  | N.D. | N.D. | 11.7 |
|            |            |        | 1.4  | 1.7 | 2.2 | 5.2 |      | N.D. | N.D. | N.D. | N.D. | N.D. |      |
|            |            |        | 1.4  | 1.8 | 2.2 | 5.0 |      | 1.0  | 1.2  | 1.8  | N.D. | N.D. |      |
| <b>148</b> | <b>167</b> | 2105.1 | 2.2  | 2.8 | 3.4 | 6.8 | 13.8 | N.D. | 2.7  | N.D. | 5.3  | N.D. | N.D. |
|            |            |        | 2.3  | 3.0 | 3.8 | 7.0 |      | N.D. | N.D. | N.D. | N.D. | N.D. |      |
|            |            |        | 2.2  | 3.0 | 3.7 | 6.2 |      | N.D. | N.D. | N.D. | N.D. | N.D. |      |
| <b>149</b> | <b>165</b> | 1744.8 | 1.0  | 1.4 | 1.6 | 4.9 | 11.4 | 1.0  | 1.2  | 1.6  | 1.9  | 4.2  | 11.3 |
|            |            |        | 1.0  | 1.3 | 1.9 | 4.8 |      | N.D. | N.D. | N.D. | N.D. | N.D. |      |
|            |            |        | 0.7  | 1.1 | 1.7 | 4.7 |      | 0.7  | N.D. | 1.7  | N.D. | N.D. |      |
| <b>149</b> | <b>167</b> | 1958.0 | 1.8  | 2.3 | 2.9 | 6.6 | 12.9 | N.D. | 2.3  | N.D. | N.D. | N.D. | N.D. |
|            |            |        | 1.8  | 2.3 | 3.2 | 6.8 |      | N.D. | N.D. | N.D. | N.D. | N.D. |      |
|            |            |        | 1.8  | 2.4 | 3.2 | 6.8 |      | N.D. | 1.8  | N.D. | N.D. | N.D. |      |
| <b>168</b> | <b>178</b> | 1167.6 | 1.9  | 1.9 | 1.8 | 3.0 | 6.6  | 2.2  | 2.4  | 2.3  | N.D. | 3.3  | 5.7  |
|            |            |        | 1.9  | 2.0 | 1.9 | 2.6 |      | N.D. | N.D. | N.D. | N.D. | N.D. |      |
|            |            |        | 2.0  | 2.1 | 2.0 | 2.9 |      | 2.5  | 2.6  | 2.7  | N.D. | 2.5  |      |
| <b>169</b> | <b>178</b> | 1054.6 | 1.1  | 1.2 | 1.0 | 1.9 | 5.6  | 1.4  | 1.5  | 1.5  | 1.9  | 2.1  | 4.7  |
|            |            |        | 1.0  | 1.2 | 1.0 | 1.4 |      | N.D. | N.D. | N.D. | N.D. | N.D. |      |
|            |            |        | 1.1  | 1.4 | 1.2 | 2.0 |      | 2.1  | 2.1  | 2.3  | 2.9  | 2.0  |      |
| <b>207</b> | <b>214</b> | 892.4  | 1.8  | 2.4 | 2.9 | 4.1 | 4.4  | 1.8  | 1.2  | 2.9  | 3.5  | 2.7  | 3.7  |
|            |            |        | 1.8  | 2.3 | 2.9 | 4.1 |      | N.D. | N.D. | N.D. | N.D. | N.D. |      |
|            |            |        | 1.9  | 2.4 | 3.0 | 4.2 |      | 1.9  | 2.2  | 2.7  | 3.4  | 3.0  |      |
| <b>215</b> | <b>229</b> | 1498.7 | 3.4  | 4.7 | 5.2 | 8.0 | 8.4  | 2.5  | 3.6  | 4.5  | 6.6  | 7.0  | 6.5  |
|            |            |        | 4.9  | 5.8 | 5.8 | 7.9 |      | N.D. | N.D. | N.D. | N.D. | N.D. |      |
|            |            |        | 5.2  | 5.7 | 6.2 | 7.4 |      | 4.2  | 4.8  | 5.6  | 6.9  | 5.1  |      |
| <b>216</b> | <b>229</b> | 1369.6 | 2.6  | 3.8 | 4.6 | 6.7 | 6.8  | 2.4  | 3.1  | 4.0  | 5.3  | 6.3  | 5.7  |
|            |            |        | 4.7  | 5.3 | 5.4 | 6.6 |      | N.D. | N.D. | N.D. | N.D. | N.D. |      |
|            |            |        | 4.7  | 5.3 | 5.4 | 6.6 |      | 3.9  | 4.6  | 5.0  | N.D. | N.D. |      |

Table S5

|     |     |        |      |      |      |      |      |      |      |      |      |      |      |
|-----|-----|--------|------|------|------|------|------|------|------|------|------|------|------|
| 230 | 241 | 1530.7 | 0.3  | 0.7  | 1.8  | 5.2  | 7.7  | 0.5  | 0.5  | 1.9  | 3.9  | 4.2  | 7.8  |
|     |     |        | 1.3  | 1.7  | 2.2  | 4.9  |      | N.D. | N.D. | N.D. | N.D. | N.D. |      |
|     |     |        | 1.3  | 1.6  | 2.2  | 5.3  |      | 1.3  | 1.7  | 2.6  | 3.7  | 4.3  |      |
| 242 | 254 | 1605.9 | 5.2  | 6.4  | 6.1  | 6.7  | 6.9  | 3.8  | 6.0  | 5.1  | 6.7  | 6.3  | 6.6  |
|     |     |        | 4.3  | 5.7  | 6.2  | 6.5  |      | N.D. | N.D. | N.D. | N.D. | N.D. |      |
|     |     |        | N.D. | 5.7  | 6.1  | 6.4  |      | 3.5  | 4.6  | 5.3  | 6.3  | 6.6  |      |
| 242 | 256 | 1833.0 | 6.2  | 8.0  | 8.0  | 8.3  | 8.4  | 5.4  | 7.4  | 7.8  | 8.2  | 8.0  | 8.0  |
|     |     |        | 4.8  | 6.5  | 7.6  | 8.1  |      | N.D. | N.D. | N.D. | N.D. | N.D. |      |
|     |     |        | 5.0  | 6.7  | 7.8  | 8.1  |      | 4.4  | 5.9  | 7.5  | 7.9  | 6.9  |      |
| 265 | 280 | 1748.9 | 5.2  | 6.4  | 7.6  | 10.4 | 17.0 | 4.7  | N.D. | 7.6  | N.D. | 10.3 | N.D. |
|     |     |        | 5.8  | 7.1  | 8.2  | 10.2 |      | 4.5  | 6.2  | 9.3  | N.D. | 6.0  |      |
|     |     |        | 5.7  | 7.0  | 8.4  | 10.4 |      | N.D. | N.D. | N.D. | N.D. | N.D. |      |
| 266 | 280 | 1619.9 | 5.2  | 6.3  | 7.5  | 9.7  | N.D. | 4.5  | 4.4  | 6.4  | 8.1  | 9.2  | N.D. |
|     |     |        | 5.4  | 6.8  | 7.6  | 9.4  |      | N.D. | N.D. | N.D. | N.D. | N.D. |      |
|     |     |        | 5.7  | 6.8  | 7.8  | 9.4  |      | 4.5  | 5.6  | 6.8  | 8.0  | 5.7  |      |
| 307 | 323 | 1986.1 | 0.4  | 0.7  | 1.3  | 6.5  | 11.2 | 0.4  | 0.5  | 1.1  | 2.8  | 3.4  | 6.4  |
|     |     |        | 0.4  | 0.6  | 0.9  | 5.1  |      | N.D. | N.D. | N.D. | N.D. | N.D. |      |
|     |     |        | 0.4  | 0.6  | 0.9  | 5.3  |      | 0.5  | 0.6  | 0.9  | 2.5  | 3.8  |      |
| 307 | 330 | 2787.5 | 1.9  | 2.4  | 3.1  | 10.4 | 15.4 | 1.7  | 2.2  | 3.2  | 5.6  | N.D. | N.D. |
|     |     |        | 2.0  | 2.3  | 2.7  | 8.6  |      | N.D. | N.D. | N.D. | N.D. | N.D. |      |
|     |     |        | 1.9  | 2.3  | 2.8  | 8.9  |      | 1.7  | 2.0  | 2.7  | 4.7  | 6.9  |      |
| 316 | 323 | 941.6  | 0.2  | 0.2  | 0.5  | 2.6  | 4.9  | 0.6  | 0.3  | 0.7  | N.D. | 2.6  | 4.3  |
|     |     |        | 0.1  | 0.2  | 0.5  | 2.1  |      | N.D. | N.D. | N.D. | N.D. | N.D. |      |
|     |     |        | N.D. | 0.2  | N.D. | 2.7  |      | 0.3  | 0.2  | N.D. | N.D. | 1.3  |      |
| 316 | 330 | 1742.9 | 1.7  | 1.9  | 2.2  | 6.2  | 8.9  | 1.3  | 1.9  | 2.0  | 4.1  | 5.7  | 8.3  |
|     |     |        | 1.7  | 1.9  | 2.2  | 5.4  |      | N.D. | N.D. | N.D. | N.D. | N.D. |      |
|     |     |        | 1.7  | 1.9  | 2.4  | 5.8  |      | 1.6  | 1.6  | 2.2  | N.D. | 3.6  |      |
| 331 | 346 | 1707.1 | 1.6  | 2.9  | 3.8  | 7.5  | 11.2 | 1.8  | 2.1  | 3.8  | 5.6  | 4.9  | 10.5 |
|     |     |        | 2.9  | 3.6  | 5.1  | 7.8  |      | N.D. | N.D. | N.D. | N.D. | N.D. |      |
|     |     |        | 2.9  | 3.5  | 5.0  | 8.2  |      | 2.5  | 3.0  | 5.0  | N.D. | N.D. |      |
| 331 | 348 | 1907.2 | 1.7  | 2.9  | 3.9  | 7.7  | 13.2 | 1.4  | 2.5  | 3.5  | N.D. | 4.8  | 11.2 |
|     |     |        | N.D. | N.D. | N.D. | N.D. |      | N.D. | N.D. | N.D. | N.D. | N.D. |      |
|     |     |        | N.D. | N.D. | N.D. | N.D. |      | 3.8  | 3.9  | 5.7  | N.D. | N.D. |      |
| 331 | 349 | 2022.2 | 1.7  | 2.9  | 3.9  | 7.7  | 13.8 | 1.5  | 2.4  | 3.7  | N.D. | 5.2  | 13.4 |
|     |     |        | 2.9  | 3.6  | 5.3  | 8.3  |      | N.D. | N.D. | N.D. | N.D. | N.D. |      |
|     |     |        | 2.9  | 3.4  | 5.2  | 8.7  |      | 2.2  | N.D. | 4.8  | N.D. | N.D. |      |
| 334 | 346 | 1381.8 | 1.5  | 2.7  | 3.6  | 6.3  | 8.1  | 1.4  | N.D. | 3.3  | N.D. | 5.6  | 6.9  |
|     |     |        | 2.6  | 3.4  | 4.7  | 6.9  |      | N.D. | N.D. | N.D. | N.D. | N.D. |      |
|     |     |        | N.D. | 3.3  | 5.2  | 7.0  |      | 2.2  | 2.8  | N.D. | N.D. | N.D. |      |
| 334 | 348 | 1582.0 | 1.5  | 2.7  | 3.7  | 6.4  | 10.2 | 0.0  | 0.9  | 1.8  | N.D. | 4.5  | 6.8  |
|     |     |        | 2.7  | 3.5  | 4.8  | N.D. |      | N.D. | N.D. | N.D. | N.D. |      |      |
|     |     |        | N.D. | 2.9  | N.D. | N.D. |      | 0.8  | 1.0  | N.D. | N.D. | N.D. |      |
| 334 | 349 | 1697.0 | 1.5  | 2.6  | 3.5  | 6.7  | 10.8 | 1.5  | 2.5  | 3.5  | N.D. | N.D. | 10.1 |
|     |     |        | 2.5  | 3.4  | 4.5  | 7.3  |      | N.D. | N.D. | N.D. | N.D. | N.D. |      |
|     |     |        | 2.9  | 3.1  | 4.6  | 7.6  |      | 2.3  | 2.6  | 4.1  | N.D. | N.D. |      |
| 347 | 364 | 2094.0 | 4.8  | 6.2  | 6.6  | 8.0  | 10.0 | 4.7  | 5.9  | 6.8  | N.D. | 8.1  | 9.9  |
|     |     |        | 4.2  | 5.6  | 6.3  | 7.4  |      | N.D. | N.D. | N.D. | N.D. | N.D. |      |
|     |     |        | N.D. | 5.8  | 6.8  | 7.8  |      | 4.1  | N.D. | 7.3  | N.D. | N.D. |      |
| 350 | 364 | 1778.8 | 4.9  | 6.4  | 6.8  | 7.7  | 8.3  | 4.7  | 6.3  | 6.8  | N.D. | 7.5  | 6.7  |
|     |     |        | 4.3  | 5.7  | 6.6  | 7.6  |      | N.D. | N.D. | N.D. | N.D. | N.D. |      |
|     |     |        | N.D. | 5.9  | 6.7  | 7.6  |      | 4.4  | 5.3  | N.D. | N.D. | 5.2  |      |
| 365 | 373 | 848.4  | 0.1  | 0.1  | 0.2  | 0.7  | 5.7  | 0.1  | 0.0  | 0.1  | 0.4  | 0.7  | 5.3  |
|     |     |        | 0.2  | 0.1  | 0.2  | 0.6  |      | N.D. | N.D. | N.D. | N.D. | N.D. |      |
|     |     |        | 0.2  | 0.2  | 0.3  | 0.2  |      | 0.1  | 0.0  | 0.1  | 0.5  | 0.4  |      |

Table S5

|            |            |       |      |      |     |     |     |      |      |      |      |      |     |
|------------|------------|-------|------|------|-----|-----|-----|------|------|------|------|------|-----|
| <b>366</b> | <b>373</b> | 777.4 | -0.1 | 0.0  | 0.1 | 0.4 | 4.9 | 0.1  | 0.1  | 0.1  | 0.4  | 0.8  | 4.5 |
|            |            |       | 0.1  | 0.0  | 0.1 | 0.2 |     | N.D. | N.D. | N.D. | N.D. | N.D. |     |
|            |            |       | 0.1  | -0.1 | 0.1 | 0.1 |     | 0.2  | 0.1  | 0.2  | N.D. | 0.5  |     |
