# Supplementary material
Source: PubMed Central journal article supplement (PMC2575452)
Supplement: 0804187105_ST6.pdf [file 0804187105_ST6.pdf]

**Table S6: Average number of deuterons incorporated in Ssa1-NBD, and in Ssa1-NBD or Ssa1-His<sub>10</sub> in the presence of the yeast nucleotide exchange factors Sse1, Snl1-ΔN, and Fes1.**

| PEPTIDE |     | AVERAGE NUMBER OF DEUTERONS INCORPORATED AFTER 10 s HX |                             |                                          |                                             |                       |                    |               |                                             |                       |                    |
|---------|-----|--------------------------------------------------------|-----------------------------|------------------------------------------|---------------------------------------------|-----------------------|--------------------|---------------|---------------------------------------------|-----------------------|--------------------|
| Start   | End | Mass (exp)<br>[Da]                                     | DATASET 1                   |                                          |                                             |                       |                    | DATASET 2     |                                             |                       |                    |
|         |     |                                                        | PROTEIN: Ssa1-NBD<br>NEF: - | Ssa1-NBD<br>Complex with<br>Sse1-strepll | Ssa1-His10<br>Complex with<br>Sse1 -strepll | Ssa1-NBD<br>+ Snl1-DN | Ssa1-NBD<br>+ Fes1 | Ssa1-NBD<br>- | Ssa1-His10<br>Complex with<br>Sse1 -strepll | Ssa1-NBD<br>+ Snl1-DN | Ssa1-NBD<br>+ Fes1 |
| 1       | 8   | 819.4                                                  | 2.3                         | 2.2                                      | N.D.                                        | 2.2                   | 3.7                | N.D.          | N.D.                                        | N.D.                  | N.D.               |
| 16      | 39  | 2657.3                                                 | 4.5                         | 4.6                                      | 3.5                                         | 5.2                   | 13.0               | 4.5           | 3.2                                         | 4.6                   | 12.2               |
| 23      | 39  | 1903.0                                                 | 3.0                         | 2.2                                      | 2.1                                         | 3.1                   | 9.2                | 4.7           | 3.8                                         | 5.0                   | 7.9                |
| 40      | 45  | 652.3                                                  | 1.7                         | 1.8                                      | 1.9                                         | 1.8                   | 2.8                | 1.7           | 1.7                                         | 1.8                   | 2.8                |
| 40      | 48  | 1050.5                                                 | 3.2                         | 3.4                                      | 3.4                                         | 2.8                   | 4.9                | 3.2           | 3.3                                         | 3.2                   | 4.6                |
| 40      | 66  | 2880.5                                                 | 7.3                         | 7.4                                      | 7.4                                         | 7.5                   | 17.5               | 8.1           | 6.5                                         | 7.9                   | 17.3               |
| 46      | 66  | 2246.1                                                 | 6.7                         | 3.7                                      | 3.4                                         | 4.8                   | 11.3               | 8.0           | 7.2                                         | 7.2                   | 11.2               |
| 49      | 63  | 1500.7                                                 | 5.8                         | 4.5                                      | 4.6                                         | 4.4                   | 7.3                | N.D.          | N.D.                                        | N.D.                  | N.D.               |
| 49      | 66  | 1847.9                                                 | 6.3                         | 3.6                                      | 3.5                                         | 3.9                   | 10.2               | 6.6           | 5.7                                         | 6.0                   | 8.8                |
| 83      | 92  | 1232.6                                                 | 1.6                         | 1.9                                      | 1.8                                         | 1.7                   | 3.7                | 1.8           | 2.0                                         | 2.0                   | N.D.               |
| 83      | 104 | 2554.3                                                 | 2.0                         | 2.3                                      | 2.1                                         | 2.3                   | 12.0               | N.D.          | N.D.                                        | N.D.                  | N.D.               |
| 93      | 102 | 1111.6                                                 | 0.7                         | 0.7                                      | 0.6                                         | N.D.                  | N.D.               | N.D.          | N.D.                                        | N.D.                  | N.D.               |
| 93      | 104 | 1339.7                                                 | 0.7                         | 0.8                                      | 0.7                                         | 0.8                   | 4.5                | N.D.          | N.D.                                        | N.D.                  | N.D.               |
| 105     | 119 | 1711.8                                                 | 2.2                         | 2.5                                      | 2.4                                         | 2.3                   | 7.0                | 2.3           | N.D.                                        | 2.4                   | 7.6                |
| 105     | 120 | 1842.9                                                 | 2.2                         | 2.5                                      | 2.4                                         | 2.4                   | 9.2                | N.D.          | N.D.                                        | N.D.                  | N.D.               |
| 106     | 119 | 1564.8                                                 | 1.8                         | 1.8                                      | 2.0                                         | 1.9                   | 6.3                | 3.0           | N.D.                                        | 3.6                   | 6.3                |
| 120     | 133 | 1598.8                                                 | 0.2                         | 0.1                                      | 0.2                                         | 0.2                   | 2.0                | -0.1          | 0.1                                         | -0.1                  | 8.2                |
| 121     | 130 | 1104.6                                                 | 0.2                         | 0.2                                      | 0.2                                         | 0.1                   | 4.3                | -0.2          | 0.1                                         | -0.1                  | 5.1                |
| 123     | 133 | 1255.6                                                 | 0.2                         | 0.3                                      | 0.3                                         | 0.3                   | 6.5                | 0.1           | 0.2                                         | 0.1                   | 6.1                |
| 132     | 139 | 878.4                                                  | 1.9                         | 1.8                                      | 1.9                                         | 2.2                   | 3.2                | N.D.          | N.D.                                        | N.D.                  | N.D.               |
| 140     | 147 | 818.4                                                  | 0.2                         | 0.4                                      | 0.4                                         | 0.5                   | 3.1                | 1.1           | N.D.                                        | 0.2                   | 3.0                |

Table S6

|         |        |     |      |      |     |      |      |      |      |      |
|---------|--------|-----|------|------|-----|------|------|------|------|------|
| 140 165 | 2692.4 | 1.8 | 2.3  | 2.3  | 2.3 | 16.9 | 1.4  | 2.3  | 1.8  | N.D. |
| 148 165 | 1892.0 | 1.2 | 1.4  | 1.4  | 1.1 | N.D. | 0.6  | 0.6  | 0.6  | 11.8 |
| 148 167 | 2105.1 | 2.1 | 2.2  | 2.2  | 2.2 | 12.2 | 1.9  | 1.8  | 1.9  | 11.4 |
| 149 165 | 1744.8 | 0.9 | 0.7  | 0.9  | 0.9 | 9.7  | 0.7  | 0.8  | 0.8  | N.D. |
| 149 167 | 1958.0 | 1.7 | 1.7  | 1.8  | 1.8 | 9.5  | 1.5  | 1.4  | 1.5  | N.D. |
| 168 178 | 1167.6 | 1.9 | 1.9  | 2.1  | 1.7 | 7.0  | 1.8  | 1.9  | 1.8  | N.D. |
| 169 178 | 1054.6 | 1.1 | 1.1  | 1.6  | 0.8 | N.D. | 1.5  | 2.3  | 1.6  | N.D. |
| 207 214 | 892.5  | 1.5 | 1.5  | 2.0  | 1.5 | 2.3  | 1.7  | 1.7  | 1.7  | 2.8  |
| 215 238 | 2641.3 | 2.4 | N.D. | N.D. | 3.7 | 7.5  | N.D. | N.D. | N.D. | N.D. |
| 215 229 | 1498.7 | 2.5 | 3.9  | 3.8  | 3.0 | 5.2  | 3.2  | 4.1  | 3.7  | 5.7  |
| 216 229 | 1369.6 | 2.5 | 3.9  | 4.0  | 3.2 | 4.5  | N.D. | N.D. | N.D. | N.D. |
| 230 241 | 1530.7 | 0.4 | 1.3  | 1.4  | 0.7 | 1.9  | 0.9  | 2.5  | 1.1  | 2.2  |
| 242 254 | 1605.9 | 4.2 | 3.4  | 3.8  | 3.8 | 3.4  | 4.1  | 3.6  | 3.5  | 3.1  |
| 242 256 | 1833.0 | 5.2 | 4.0  | 4.3  | 4.5 | 4.1  | 5.1  | 4.4  | 4.7  | 4.0  |
| 265 280 | 1748.9 | 4.6 | 5.7  | 5.3  | 5.0 | 3.0  | 4.5  | N.D. | 5.0  | 2.6  |
| 266 280 | 1619.9 | 4.8 | 4.8  | 5.1  | 5.1 | 3.1  | 4.7  | 4.8  | 4.8  | 2.9  |
| 285 290 | 726.3  | 1.1 | 1.3  | 1.4  | 1.1 | 1.2  | 0.9  | N.D. | 0.8  | 1.0  |
| 307 315 | 1062.5 | 0.8 | N.D. | N.D. | 0.7 | 2.6  | 1.7  | N.D. | 2.4  | N.D. |
| 307 323 | 1986.1 | 0.3 | 0.4  | 0.4  | 0.4 | 4.9  | 0.3  | 0.4  | 0.4  | 1.3  |
| 307 330 | 2787.5 | 1.8 | 1.8  | 1.9  | 1.9 | 7.0  | 1.6  | 1.8  | 1.8  | 2.2  |
| 316 330 | 1742.9 | 1.4 | 1.4  | 1.5  | 1.4 | 4.3  | 1.3  | 1.7  | 1.5  | 1.6  |
| 331 346 | 1707.0 | 1.6 | 2.8  | 2.8  | 3.3 | 6.7  | 1.5  | 2.6  | 3.0  | N.D. |
| 331 349 | 2022.2 | 1.7 | 2.9  | 2.4  | 2.9 | N.D. | 1.4  | 2.3  | 2.7  | N.D. |
| 334 346 | 1381.8 | 1.3 | 2.3  | 2.8  | 2.6 | N.D. | N.D. | N.D. | N.D. | N.D. |
| 334 348 | 1582.0 | 1.4 | 2.4  | 2.2  | 2.6 | 6.4  | N.D. | N.D. | N.D. | N.D. |
| 334 349 | 1697.0 | 1.3 | 2.1  | 2.2  | 2.8 | 7.0  | 0.5  | 0.7  | 1.0  | N.D. |
| 347 364 | 2094.0 | 4.2 | 3.8  | 3.9  | 4.3 | 7.3  | 4.4  | 4.1  | 4.3  | 7.5  |
| 349 365 | 1964.9 | 4.2 | 3.7  | 3.6  | 4.2 | 7.1  | 4.4  | N.D. | 4.3  | 7.1  |
| 350 364 | 1778.8 | 4.3 | 3.8  | 3.9  | 4.4 | 6.1  | 4.5  | N.D. | 4.5  | 12.2 |
| 365 373 | 848.4  | 0.1 | 0.1  | 0.1  | 0.2 | 3.9  | 0.4  | 1.2  | 0.8  | 3.9  |
| 366 373 | 777.4  | 0.0 | 0.1  | 0.0  | 0.1 | 3.2  | -0.2 | 0.2  | 0.1  | 3.9  |
